# Supplementary material for: Sec17/Sec18 act twice, enhancing membrane fusion and then disassembling cis-SNARE complexes
Source: eLife journal article supplement (doi:10.7554/elife.26646), 2017-07-18
Supplement: supp [file elife-26646-supp-v1.zip]

Archive with 19 entries (19 files):
- elife_poa_e26646_Figure_4_Source_Data_1.xlsx
- elife_poa_e26646_Figure_7_Source_Data_1.xlsx
- elife_poa_e26646_Figure_6_Source_Data_2.xlsx
- elife_poa_e26646_Figure_6_Figure_Supplement_1.pdf
- elife_poa_e26646_Figure_3_Figure_Supplement_3.pdf
- elife_poa_e26646_Figure_5_Source_Data_3.xlsx
- elife_poa_e26646_Figure_5_Figure_Supplement_1.pdf
- elife_poa_e26646_Figure_2_Source_Data_1.xlsx
- elife_poa_e26646_Figure_3_Figure_Supplement_2.pdf
- elife_poa_e26646_Figure_2_Source_Data_2.xlsx
- elife_poa_e26646_Figure_2_Figure_Supplement_1.pdf
- elife_poa_e26646_Figure_3_Figure_Supplement_1.pdf
- elife_poa_e26646_Figure_6_Source_Data_1.xlsx
- elife_poa_e26646_Figure_5_Source_Data_2.xlsx
- elife_poa_e26646_Figure_3_Figure_Supplement_4.pdf
- elife_poa_e26646_Figure_7_Figure_Supplement_1.pdf
- elife_poa_e26646_Figure_5_Source_Data_1.xlsx
- elife_poa_e26646_Figure_3_Source_Data_1.xlsx
- elife_poa_e26646_Figure_4_Figure_Supplement_1.pdf
