# Supplementary figures and images for: Sec17/Sec18 act twice, enhancing membrane fusion and then disassembling cis-SNARE complexes
Source: eLife journal article supplement (doi:10.7554/elife.26646), 2017-07-18

A

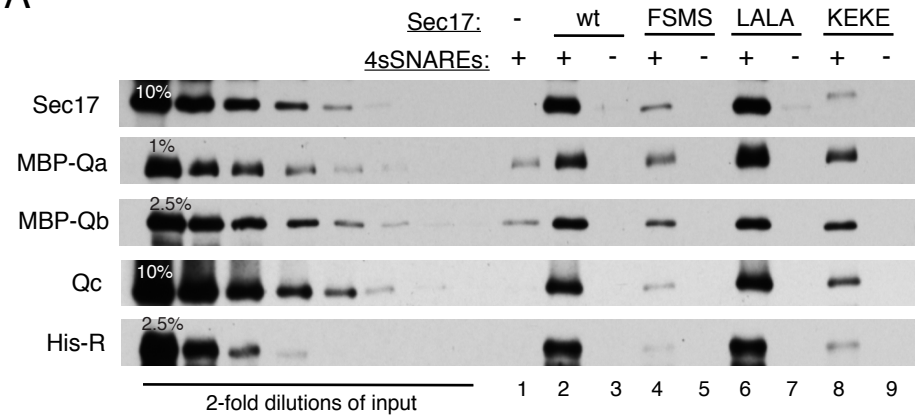

B

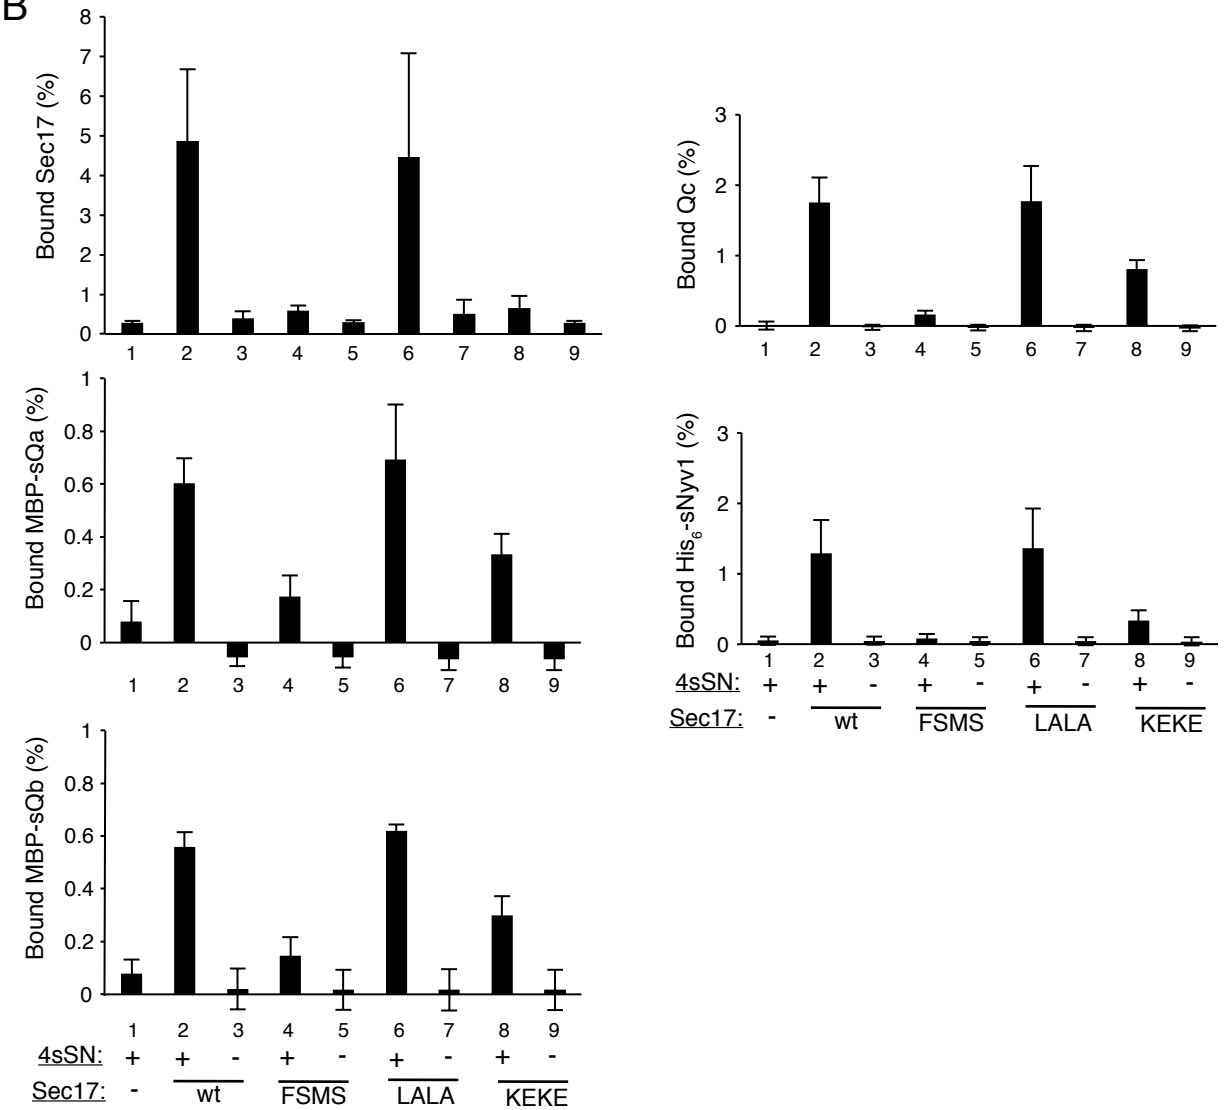

Supplement: supp [file elife-26646-supp-v1.zip]

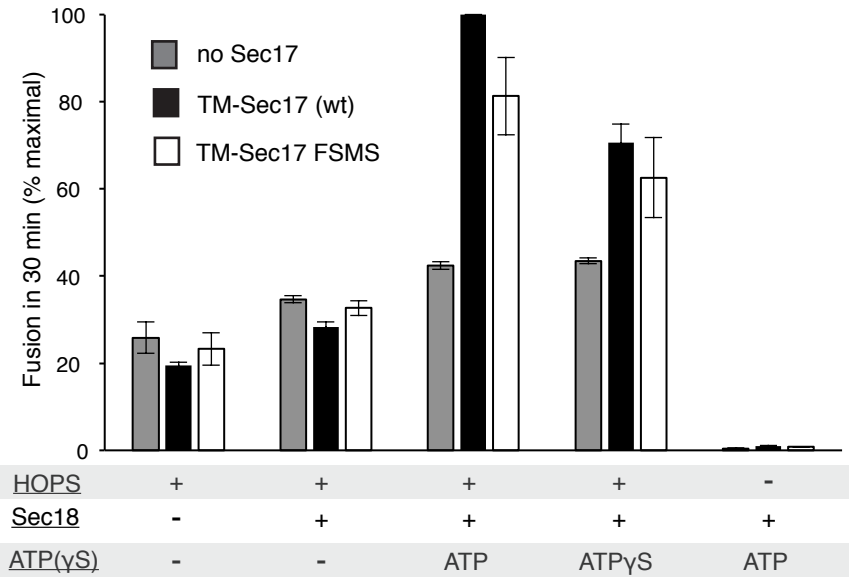

Supplement: supp [file elife-26646-supp-v1.zip]

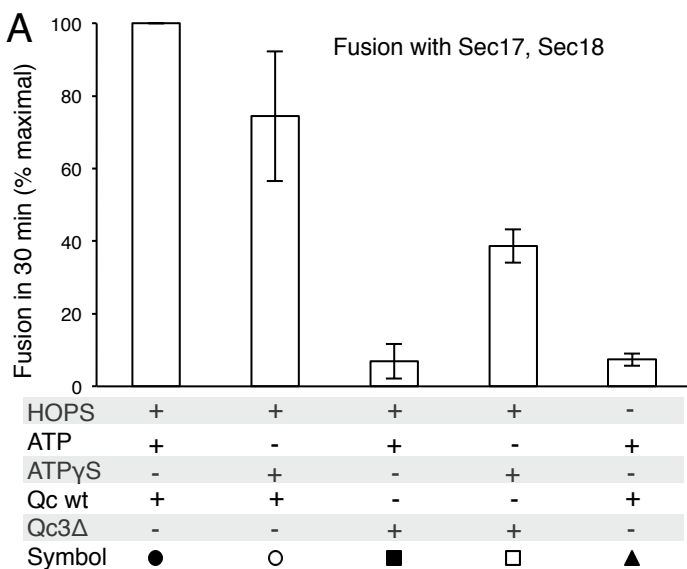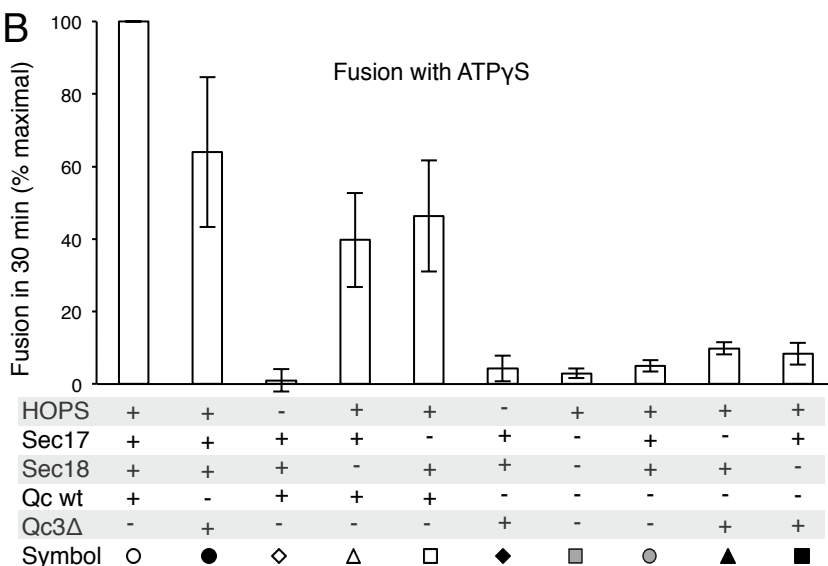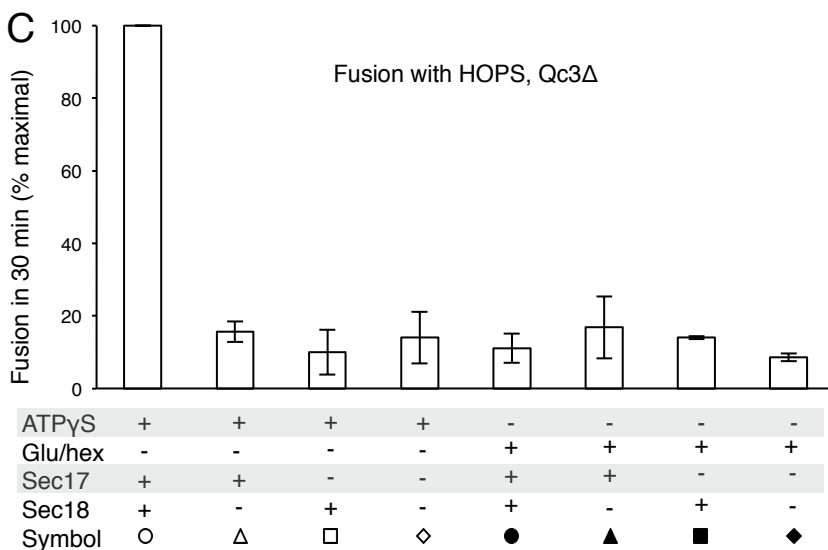

Supplement: supp [file elife-26646-supp-v1.zip]

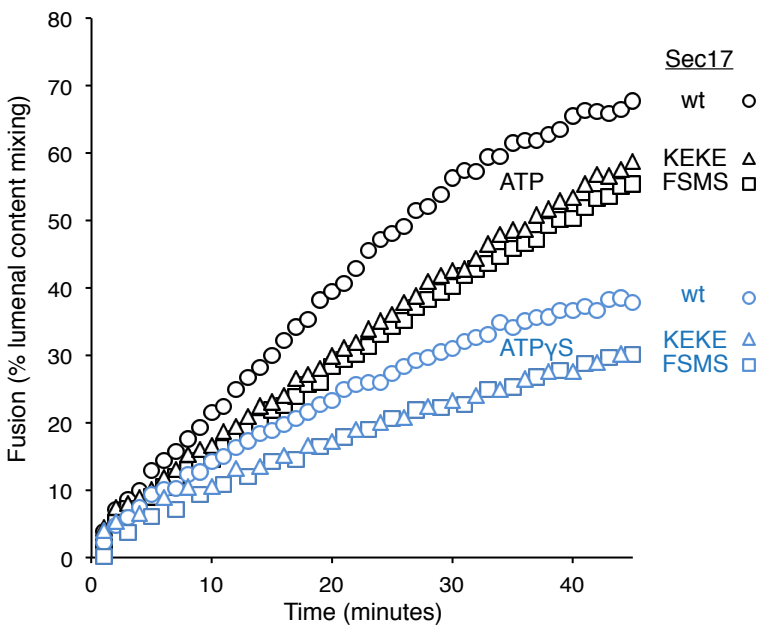

Supplement: supp [file elife-26646-supp-v1.zip]

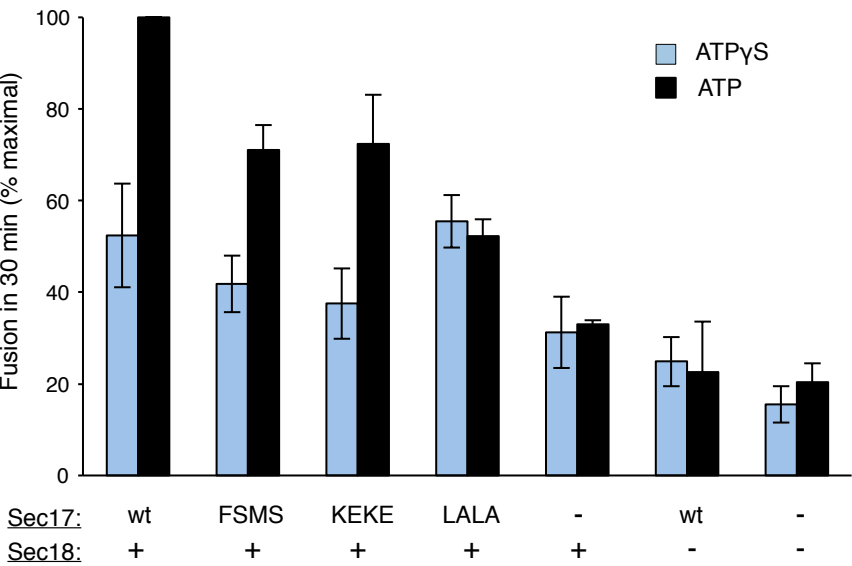

Supplement: supp [file elife-26646-supp-v1.zip]

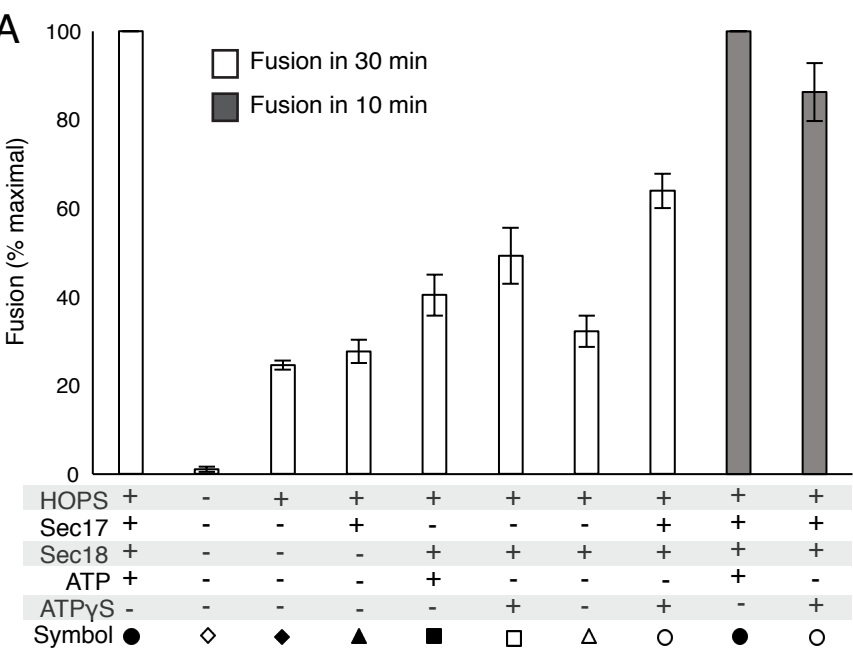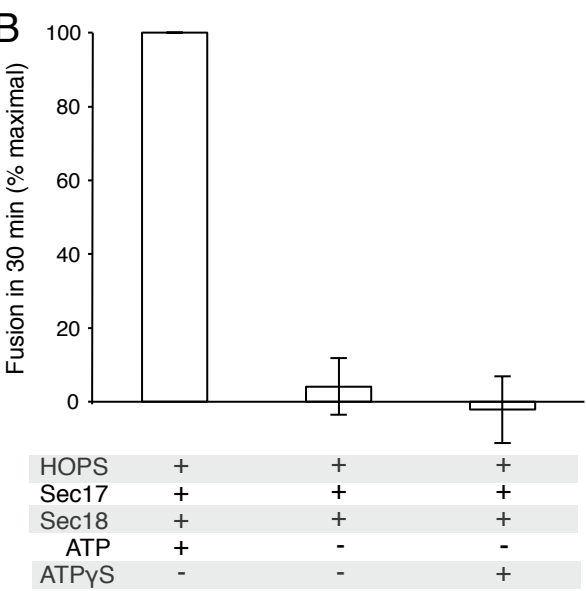

Supplement: supp [file elife-26646-supp-v1.zip]

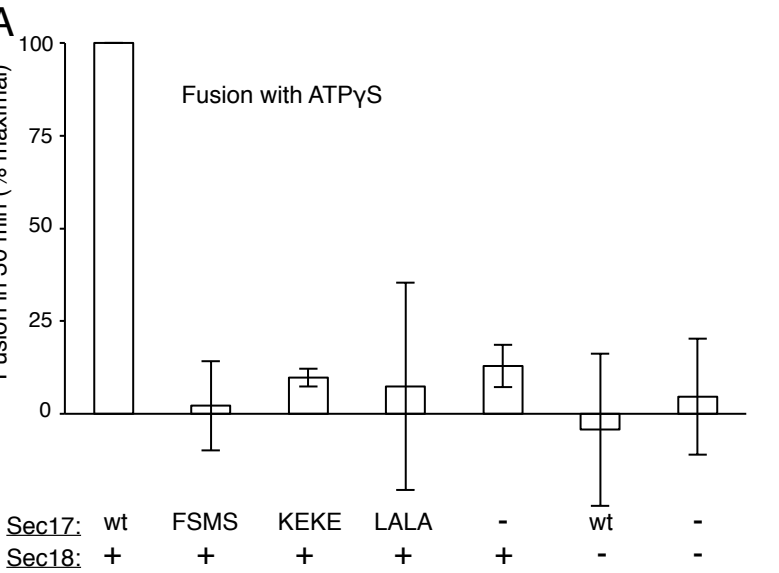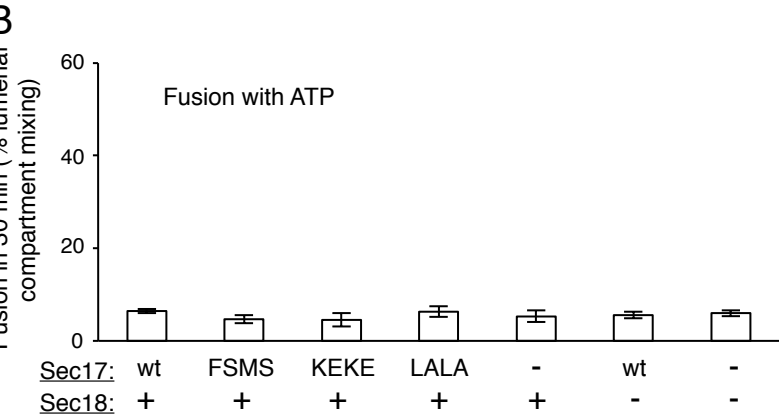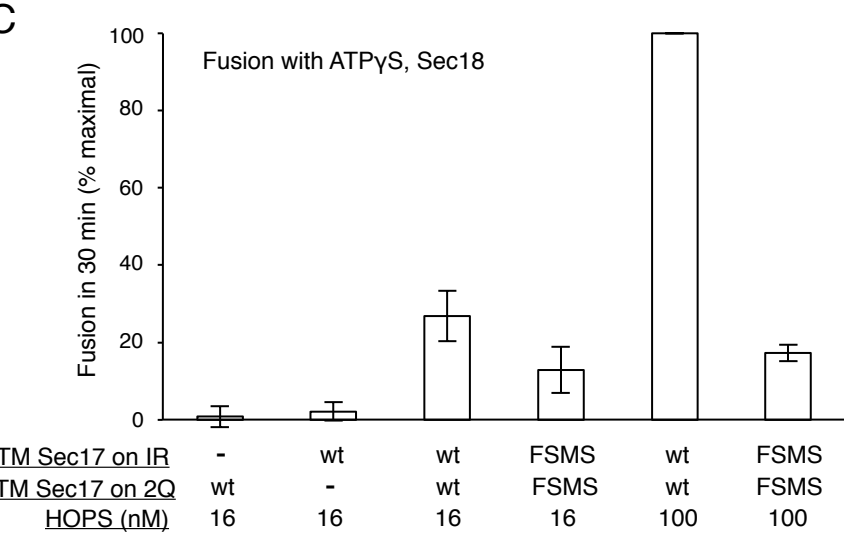

Supplement: supp [file elife-26646-supp-v1.zip › elife_poa_e26646_Figure_6_Figure_Supplement_1.pdf]

Song *et al*, 2017 - Figure 3 Suppl 3

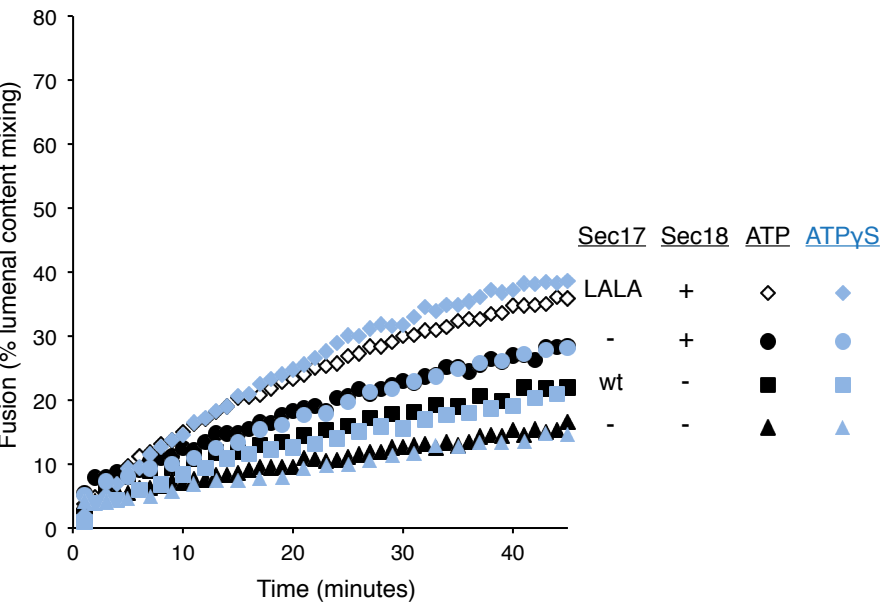

Supplement: supp [file elife-26646-supp-v1.zip › elife_poa_e26646_Figure_3_Figure_Supplement_3.pdf]

Initially omitted  
component(s):

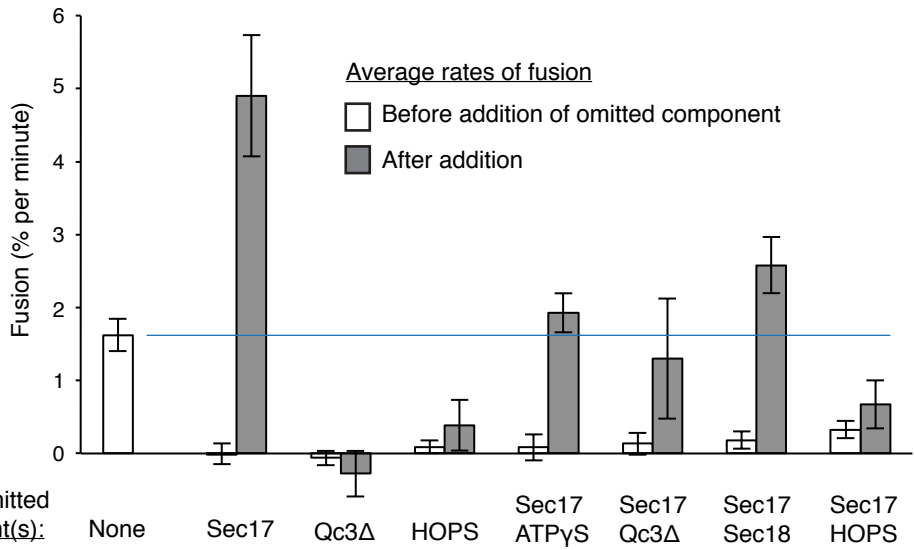

Supplement: supp [file elife-26646-supp-v1.zip › elife_poa_e26646_Figure_7_Figure_Supplement_1.pdf]
